# Supplementary material for: CGRclust: Chaos Game Representation for twin contrastive clustering of unlabelled DNA sequences
Source: PubMed Central journal article supplement (PMC11657719; doi:10.1186/s12864-024-11135-y), 2024-12-18
Supplement: 12864_2024_11135_MOESM6_ESM.pdf [file 12864_2024_11135_MOESM6_ESM.pdf]

# Supplementary Material 6

## CGRclust Training Times Across Different Tests

Fatemeh Alipour<sup>1</sup> and Kathleen A. Hill<sup>2</sup>, Lila Kari<sup>1</sup>

<sup>1</sup> School of Computer Science, University of Waterloo, Waterloo, ON, Canada

<sup>2</sup> Department of Biology, University of Western Ontario, London, ON, Canada  
`falipour@uwaterloo.ca`

The training times for CGRclust were recorded for each clustering test, as detailed in Table S6.1. As the results show, the time required for each clustering task is directly correlated with the number of genome sequences in the dataset, indicating that increased dataset size increases computational complexity and extends clustering duration—an expected behavior in clustering algorithms. The length of the DNA sequences, however, influences the training time minimally, impacting only the pre-processing phase. In the pre-processing phase, genome sequences are transformed into Frequency Chaos Game Representations (FCGRs), converting them into 64x64 matrices when  $k = 6$ . This transformation ensures uniformity in data handling, as all sequences, regardless of their original lengths, are represented by matrices of the same dimensions. Consequently, after this conversion to FCGRs, the clustering algorithm processes datasets of these fixed-sized matrices, making the original sequence lengths irrelevant in terms of computational load during the clustering stage. As a result of this fixed-size representation, the clustering algorithm is focused on analyzing patterns within FCGRs rather than managing different sequence lengths.

Table S6.1: CGRclust training time across twenty-five clustering tests

| Test | Dataset                 | Number of Sequences | Time (seconds) |
|------|-------------------------|---------------------|----------------|
| 1    | Cypriniformes           | 498                 | 551.240        |
| 2    | Cyprinoidei             | 630                 | 634.810        |
| 3    | Cyprinidae              | 448                 | 476.283        |
| 4    | Cyprininae              | 213                 | 413.320        |
| 5    | Astroviridae-unbalanced | 1,089               | 843.984        |
| 6    | Astroviridae-balanced   | 726                 | 712.654        |
| 7    | Dengue                  | 1,628               | 1146.037       |
| 8    | HCV                     | 950                 | 720.595        |
| 9    | HIV-1                   | 1300                | 961.421        |
| 10   | Insecta                 | 4,550               | 2255.074       |
| 11   | Protista                | 945                 | 725.403        |
| 12   | Fungi-phylum            | 670                 | 662.347        |
| 13   | Fungi-subphylum         | 1,070               | 859.819        |
| 14   | Medium-60               | 18,210              | 7973.674       |
| 15   | Medium-70               | 18,731              | 8170.432       |
| 16   | Medium-80               | 20,939              | 9167.305       |
| 17   | Medium-90               | 21,266              | 9275.432       |
| 18   | Medium-95               | 24,039              | 8764.424       |
| 19   | Medium-97               | 20,772              | 8731.778       |
| 20   | Long-60                 | 20,885              | 8941.603       |
| 21   | Long-70                 | 18,558              | 8023.114       |
| 22   | Long-80                 | 20,525              | 8886.094       |
| 23   | Long-90                 | 22,518              | 9592.560       |
| 24   | Long-95                 | 20,222              | 8764.240       |
| 25   | Long-97                 | 19,960              | 8731.778       |
